# Supplementary material
Source: Research Square preprint supplement (doi:10.21203/rs.3.rs-9500210/v1)
Supplement: Supplementary file 1 [file 50cb1a9e5742dc18decb51ce.docx]

**Table 1. Demographic Characteristics**

| **Variable** | **Mild OSAS (n=19)** | **Moderate OSAS (n=25)** | **Severe OSAS (n=19)** | **Control (n=43)** | **Test** | **p** |
| --- | --- | --- | --- | --- | --- | --- |
| **Age (years)** | 40.16±7.54 | 36.08±5.71 | 36.95±5.75 | 37.23±6.32 | One-Way ANOVA | 0.192 |
| **Gender (M/F)** | No data* | 16/9 | 17/2 | 29/14 | Chi-square | 0.133 |

**Mean**: Mean, **SD**: Standard Deviation. *Gender data for the Mild OSAS group was not coded in the dataset. **p>0.05: not statistically significant.**

**Table 2. Right and Left Ear ECochG Parameters – Between-Group Comparison**

| | **Parameter** | **Mild OSAS (n=19)** | **Moderate OSAS (n=25)** | **Severe OSAS (n=19)** | **Control (n=43)** | **Test** | **p** | **Effect Size** | | --- | --- | --- | --- | --- | --- | --- | --- | |  | **Med(IQR) or Mean±SD** | **Med(IQR) or Mean±SD** | **Med(IQR) or Mean±SD** | **Med(IQR) or Mean±SD** |  |  | **η²/ε²** | | **Right Base (ms)** | 0.55 (0.42) | 0.81 (0.32) | 0.49 (0.35) | 0.70 (0.09) | K-W | **<0.001***** | ε²=0.150 | | Post-hoc (Bonferroni) | **0.011*** | p>0.05 | p>0.05 | **<0.001***** | p>0.05 | p>0.05 |  | | **Right SP (ms)** | 0.83±0.24 | 1.10±0.38 | 0.78±0.32 | 0.93±0.06 | ANOVA | **<0.001***** | η²=0.162 | | Post-hoc (Bonferroni) | p>0.05 | p>0.05 | p>0.05 | **0.013*** | p>0.05 | p>0.05 |  | | **Right AP (ms)** | 1.22 (0.46) | 1.32 (0.50) | 1.19 (0.49) | 1.40 (0.10) | K-W | **0.011*** | ε²=0.080 | | Post-hoc (Bonferroni) | p>0.05 | p>0.05 | p>0.05 | p>0.05 | p>0.05 | **0.032*** |  | | **Right SP–Base (ms)** | 0.19 (0.12) | 0.21 (0.06) | 0.19 (0.13) | 0.23 (0.01) | K-W | **0.009**** | ε²=0.085 | | Post-hoc (Bonferroni) | p>0.05 | p>0.05 | p>0.05 | p>0.05 | **0.007**** | p>0.05 |  | | **Right AP–Base (ms)** | 0.61±0.13 | 0.54±0.13 | 0.64±0.15 | 0.70±0.04 | ANOVA | **<0.001***** | η²=0.286 | | Post-hoc (Bonferroni) | p>0.05 | p>0.05 | **0.034*** | **0.041*** | **<0.001***** | p>0.05 |  | | **Right SP–Base (µV)** | 0.25 (0.19) | 0.15 (0.08) | 0.14 (0.10) | 0.11 (0.03) | K-W | **<0.001***** | ε²=0.175 | | Post-hoc (Bonferroni) | p>0.05 | p>0.05 | **<0.001***** | p>0.05 | p>0.05 | p>0.05 |  | | **Right AP–Base (µV)** | 0.28 (0.22) | 0.26 (0.14) | 0.31 (0.16) | 0.28 (0.05) | K-W | p>0.05 | ε²=0.000 | | **Right SP/AP amplitude ratio** | 1.00 (0.73) | 0.59 (0.40) | 0.45 (0.33) | 0.40 (0.03) | K-W | **<0.001***** | ε²=0.199 | | Post-hoc (Bonferroni) | p>0.05 | **0.009**** | **<0.001***** | p>0.05 | p>0.05 | p>0.05 |  | | **Right SP/AP area ratio** | 43.67 (44.80) | 8.26 (9.96) | 2.15 (4.13) | 2.01 (0.43) | K-W | **<0.001***** | ε²=0.558 | | Post-hoc (Bonferroni) | **0.024*** | **<0.001***** | **<0.001***** | **0.020*** | **<0.001***** | p>0.05 |  | | **Right SP area (ms·µV)** | 3.93 (2.55) | 0.33 (0.45) | 0.16 (0.22) | 0.17 (0.05) | K-W | **<0.001***** | ε²=0.517 | | Post-hoc (Bonferroni) | **<0.001***** | **<0.001***** | **<0.001***** | p>0.05 | **0.010*** | p>0.05 |  | | **Right AP area (ms·µV)** | 0.11 (0.09) | 0.05 (0.06) | 0.09 (0.05) | 0.08 (0.01) | K-W | **<0.001***** | ε²=0.140 | | Post-hoc (Bonferroni) | **0.005**** | p>0.05 | p>0.05 | **0.012*** | **0.003**** | p>0.05 |  | |
| --- | --- | --- | --- | --- | --- | --- | --- | --- | --- | --- | --- | --- | --- | --- | --- | --- | --- | --- | --- | --- | --- | --- | --- | --- | --- | --- | --- | --- | --- | --- | --- | --- | --- | --- | --- | --- | --- | --- | --- | --- | --- | --- | --- | --- | --- | --- | --- | --- | --- | --- | --- | --- | --- | --- | --- | --- | --- | --- | --- | --- | --- | --- | --- | --- | --- | --- | --- | --- | --- | --- | --- | --- | --- | --- | --- | --- | --- | --- | --- | --- | --- | --- | --- | --- | --- | --- | --- | --- | --- | --- | --- | --- | --- | --- | --- | --- | --- | --- | --- | --- | --- | --- | --- | --- | --- | --- | --- | --- | --- | --- | --- | --- | --- | --- | --- | --- | --- | --- | --- | --- | --- | --- | --- | --- | --- | --- | --- | --- | --- | --- | --- | --- | --- | --- | --- | --- | --- | --- | --- | --- | --- | --- | --- | --- | --- | --- | --- | --- | --- | --- | --- | --- | --- | --- | --- | --- | --- | --- | --- | --- | --- | --- | --- | --- | --- | --- | --- | --- | --- | --- | --- | --- | --- | --- | --- | --- | --- | --- | --- | --- | --- | --- | --- | --- |
| | **Parameter** | **Mild OSAS (n=19)** | **Moderate OSAS (n=25)** | **Severe OSAS (n=19)** | **Control (n=43)** | **Test** | **p** | **Effect Size** | | --- | --- | --- | --- | --- | --- | --- | --- | |  | **Med(IQR) or Mean±SD** | **Med(IQR) or Mean±SD** | **Med(IQR) or Mean±SD** | **Med(IQR) or Mean±SD** |  |  | **η²/ε²** | | **Left Base (ms)** | 0.81 (0.45) | 0.96 (0.31) | 0.90 (0.48) | 0.78 (0.08) | K-W | **0.004**** | ε²=0.102 | | Post-hoc (Bonferroni) | p>0.05 | p>0.05 | p>0.05 | p>0.05 | **0.003**** | p>0.05 |  | | **Left SP (ms)** | 1.05 (0.52) | 1.30 (0.37) | 1.03 (0.61) | 1.00 (0.08) | K-W | **<0.001***** | ε²=0.241 | | Post-hoc (Bonferroni) | **<0.001***** | p>0.05 | p>0.05 | **0.035*** | **<0.001***** | p>0.05 |  | | **Left AP (ms)** | 1.32 (0.47) | 1.81 (0.56) | 1.34 (0.47) | 1.51 (0.10) | K-W | **<0.001***** | ε²=0.258 | | Post-hoc (Bonferroni) | **<0.001***** | p>0.05 | p>0.05 | **<0.001***** | **<0.001***** | p>0.05 |  | | **Left SP–Base (ms)** | 0.21 (0.09) | 0.36 (0.06) | 0.24 (0.12) | 0.22 (0.00) | K-W | **<0.001***** | ε²=0.498 | | Post-hoc (Bonferroni) | **<0.001***** | p>0.05 | p>0.05 | **<0.001***** | **<0.001***** | p>0.05 |  | | **Left AP–Base (ms)** | 0.60 (0.12) | 0.80 (0.18) | 0.57 (0.17) | 0.72 (0.06) | K-W | **<0.001***** | ε²=0.382 | | Post-hoc (Bonferroni) | **<0.001***** | p>0.05 | **<0.001***** | **<0.001***** | p>0.05 | **0.007**** |  | | **Left SP–Base (µV)** | 0.21 (0.20) | 0.16 (0.14) | 0.17 (0.17) | 0.13 (0.04) | K-W | p>0.05 | ε²=0.025 | | **Left AP–Base (µV)** | 0.38 (0.16) | 0.28 (0.16) | 0.40 (0.15) | 0.31 (0.05) | K-W | **0.038*** | ε²=0.053 | | Post-hoc (Bonferroni) | p>0.05 | p>0.05 | p>0.05 | p>0.05 | p>0.05 | p>0.05 |  | | **Left SP/AP amplitude ratio** | 0.57 (0.43) | 0.58 (0.31) | 0.52 (0.29) | 0.41 (0.05) | K-W | **0.017*** | ε²=0.071 | | Post-hoc (Bonferroni) | p>0.05 | p>0.05 | p>0.05 | p>0.05 | p>0.05 | p>0.05 |  | | **Left SP/AP area ratio** | 60.36 (93.78) | 2.90 (7.11) | 1.95 (4.81) | 1.95 (0.21) | K-W | **<0.001***** | ε²=0.412 | | Post-hoc (Bonferroni) | **<0.001***** | **<0.001***** | **<0.001***** | p>0.05 | p>0.05 | p>0.05 |  | | **Left SP area (ms·µV)** | 5.39 (5.10) | 0.21 (0.38) | 0.14 (0.36) | 0.20 (0.05) | K-W | **<0.001***** | ε²=0.405 | | Post-hoc (Bonferroni) | **<0.001***** | **<0.001***** | **<0.001***** | p>0.05 | p>0.05 | p>0.05 |  | | **Left AP area (ms·µV)** | 0.08 (0.04) | 0.05 (0.07) | 0.06 (0.03) | 0.10 (0.02) | K-W | **<0.001***** | ε²=0.305 | | Post-hoc (Bonferroni) | p>0.05 | p>0.05 | **0.005**** | p>0.05 | **<0.001***** | **0.002**** |  | |

**Med**: Median, **IQR**: Interquartile Range, **Mean**: Mean, **SD**: Standard Deviation. **K-W**: Kruskal-Wallis test; **ANOVA**: One-Way ANOVA. Effect size: η² (for ANOVA), ε² (for Kruskal-Wallis). Post-hoc: Dunn test with Bonferroni correction. * p<0.05 ** p<0.01 *** p<0.001

**Table 3. ROC Analysis – Diagnostic Accuracy (Ranked by AUC)**

| **Parameter** | **Group** | **AUC** | **95% CI** | **Cutoff** | **Sens.** | **Spec.** |
| --- | --- | --- | --- | --- | --- | --- |
| Right SP/AP area ratio | Mild OSAS | **1.000** | [1.000, 1.000] | 3.410 | 100.0% | 100.0% |
| Right SP area (ms·µV) | Mild OSAS | **1.000** | [1.000, 1.000] | 0.580 | 100.0% | 100.0% |
| Left SP–Base (ms) | Moderate OSAS | **1.000** | [1.000, 1.000] | 0.270 | 100.0% | 100.0% |
| Left SP/AP area ratio | Mild OSAS | **1.000** | [1.000, 1.000] | 4.310 | 100.0% | 100.0% |
| Left SP area (ms·µV) | Mild OSAS | **1.000** | [1.000, 1.000] | 0.560 | 100.0% | 100.0% |
| Left AP–Base (ms) | Mild OSAS | **0.925** | [0.834, 0.996] | 0.660 | 84.2% | 97.7% |
| Left SP (ms) | Moderate OSAS | **0.914** | [0.810, 0.986] | 1.190 | 80.0% | 100.0% |
| Right AP–Base (ms) | Moderate OSAS | **0.909** | [0.798, 0.990] | 0.620 | 80.0% | 100.0% |
| Right SP/AP area ratio | Moderate OSAS | **0.879** | [0.739, 0.993] | 2.740 | 82.6% | 100.0% |
| Left AP (ms) | Moderate OSAS | **0.852** | [0.722, 0.962] | 1.700 | 68.0% | 100.0% |
| Right SP/AP amplitude ratio | Mild OSAS | **0.846** | [0.683, 0.991] | 0.430 | 78.9% | 97.7% |
| Left AP area (ms·µV) | Moderate OSAS | **0.843** | [0.707, 0.960] | 0.080 | 72.0% | 100.0% |
| Left AP area (ms·µV) | Severe OSAS | **0.838** | [0.646, 1.000] | 0.080 | 80.0% | 100.0% |
| Right SP–Base (µV) | Mild OSAS | **0.799** | [0.632, 0.947] | 0.190 | 73.7% | 100.0% |
| Right SP area (ms·µV) | Moderate OSAS | **0.797** | [0.648, 0.933] | 0.220 | 72.0% | 93.0% |
| Left Base (ms) | Moderate OSAS | **0.788** | [0.636, 0.920] | 0.890 | 64.0% | 100.0% |
| Right SP–Base (ms) | Moderate OSAS | **0.787** | [0.622, 0.929] | 0.220 | 76.0% | 100.0% |
| Right AP area (ms·µV) | Moderate OSAS | **0.785** | [0.642, 0.905] | 0.070 | 64.0% | 97.7% |
| Left AP area (ms·µV) | Mild OSAS | **0.785** | [0.600, 0.939] | 0.080 | 68.4% | 100.0% |
| Left AP–Base (ms) | Severe OSAS | **0.759** | [0.558, 0.917] | 0.660 | 73.7% | 97.7% |
| Right AP (ms) | Severe OSAS | **0.729** | [0.541, 0.907] | 1.270 | 61.1% | 100.0% |
| Right AP–Base (ms) | Mild OSAS | **0.720** | [0.539, 0.871] | 0.590 | 47.4% | 100.0% |
| Right Base (ms) | Moderate OSAS | **0.719** | [0.558, 0.862] | 0.810 | 56.0% | 100.0% |
| Right Base (ms) | Severe OSAS | **0.717** | [0.533, 0.891] | 0.540 | 57.9% | 100.0% |
| Right SP–Base (µV) | Moderate OSAS | **0.717** | [0.547, 0.870] | 0.140 | 64.0% | 93.0% |
| Right SP (ms) | Severe OSAS | **0.711** | [0.526, 0.895] | 0.830 | 68.4% | 100.0% |
| Left SP/AP area ratio | Moderate OSAS | **0.709** | [0.534, 0.875] | 2.330 | 63.6% | 100.0% |
| Right AP (ms) | Mild OSAS | **0.702** | [0.519, 0.884] | 1.290 | 63.2% | 97.7% |

Cutoff points were determined using the Youden index (J = Sensitivity + Specificity − 1). AUC 95% confidence intervals were calculated with 2000 bootstrap iterations. All comparisons were made between the relevant OSAS subgroup and the Control group. **AUC**: ≥0.90 Excellent | 0.80–0.89 Good | 0.70–0.79 Acceptable. **Sens.**: Sensitivity; **Spec.**: Specificity; **CI**: Confidence Interval.
